# Supplementary material for: Vertically stacked bilayer heterostructure CoFe2O4@Ni3S2 on a 3D nickel foam as a high-performance electrocatalyst for the oxygen evolution reaction
Source: Royal Society of Chemistry journal article supplement (doi:10.1039/c9nj05077a), 2019-12-12
Supplement: c9nj05077a1.pdf [file c9nj05077a1.pdf]

Vertically stacked bilayer heterostructure  $\text{CoFe}_2\text{O}_4 @ \text{Ni}_3\text{S}_2$  on 3D nickel foam as high-performance electrocatalyst for oxygen evolution reaction

Jingyi Wang,<sup>a</sup> Zhi Yang,<sup>b</sup> Meilin Zhang,<sup>b</sup> Yaqiong Gong<sup>b\*</sup>

<sup>a</sup> Materials Science and Engineering Institute, Taiyuan University of Technology, Shanxi, 030024.

<sup>b</sup> Chemical Engineering and Technology Institute, North University of China, Taiyuan, Shanxi 030051.

E-mail:gyq@nuc.edu.cn;

**Keywords:**  $\text{CoFe}_2\text{O}_4$  nanosheets,  $\text{Ni}_3\text{S}_2$  nanosheets, Oxygen evolution reaction (OER), Nickel foam, Synergistic effect

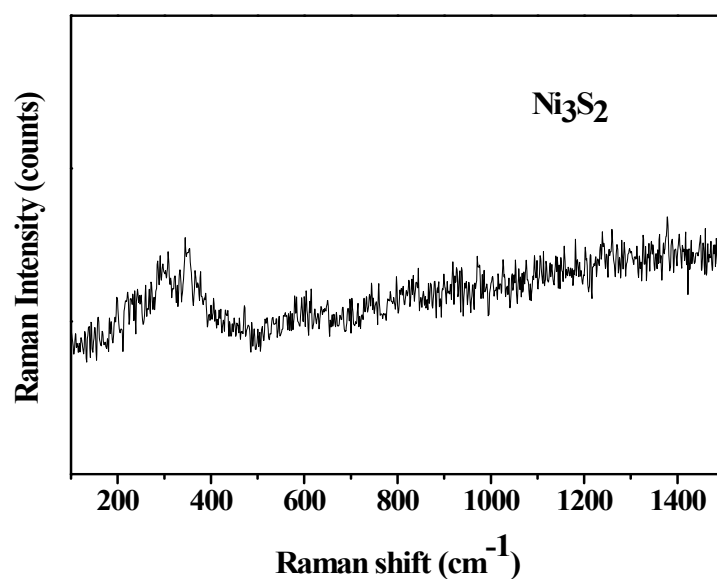

Figure S1 the Raman intensity of  $\text{Ni}_3\text{S}_2/\text{NF}$ .

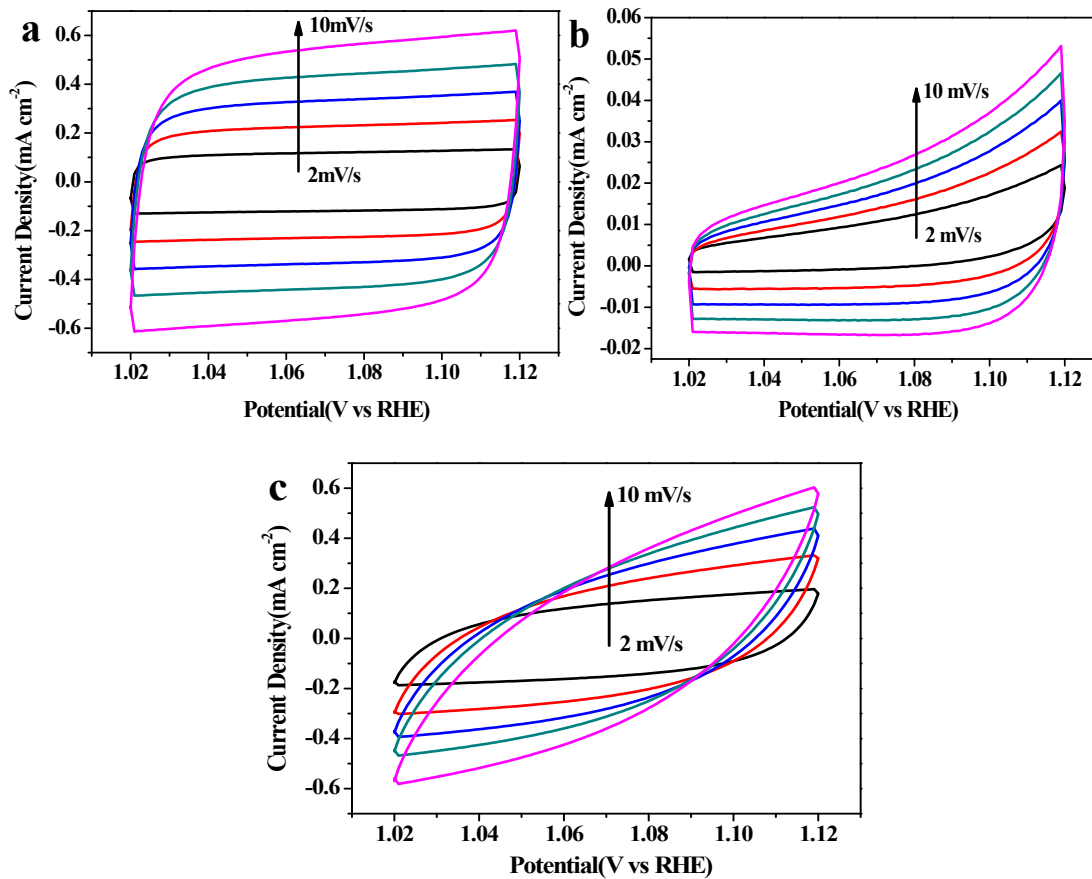

Figure S2 Electrochemical double-layer capacitance measurements. The cyclic voltammograms (CVs) measurements with various scan rates for CoFe<sub>2</sub>O<sub>4</sub>/NF(a) Ni<sub>3</sub>S<sub>2</sub>/NF (b) CoFe<sub>2</sub>O<sub>4</sub>@Ni<sub>3</sub>S<sub>2</sub>/NF (c) in 1.0 M KOH.

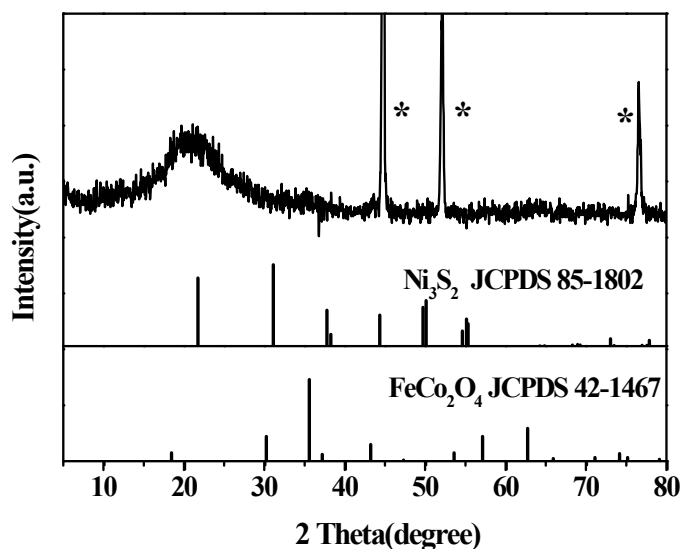

Figure S3 The XRD spectra of CoFe<sub>2</sub>O<sub>4</sub>@Ni<sub>3</sub>S<sub>2</sub>/NF after OER stability test.

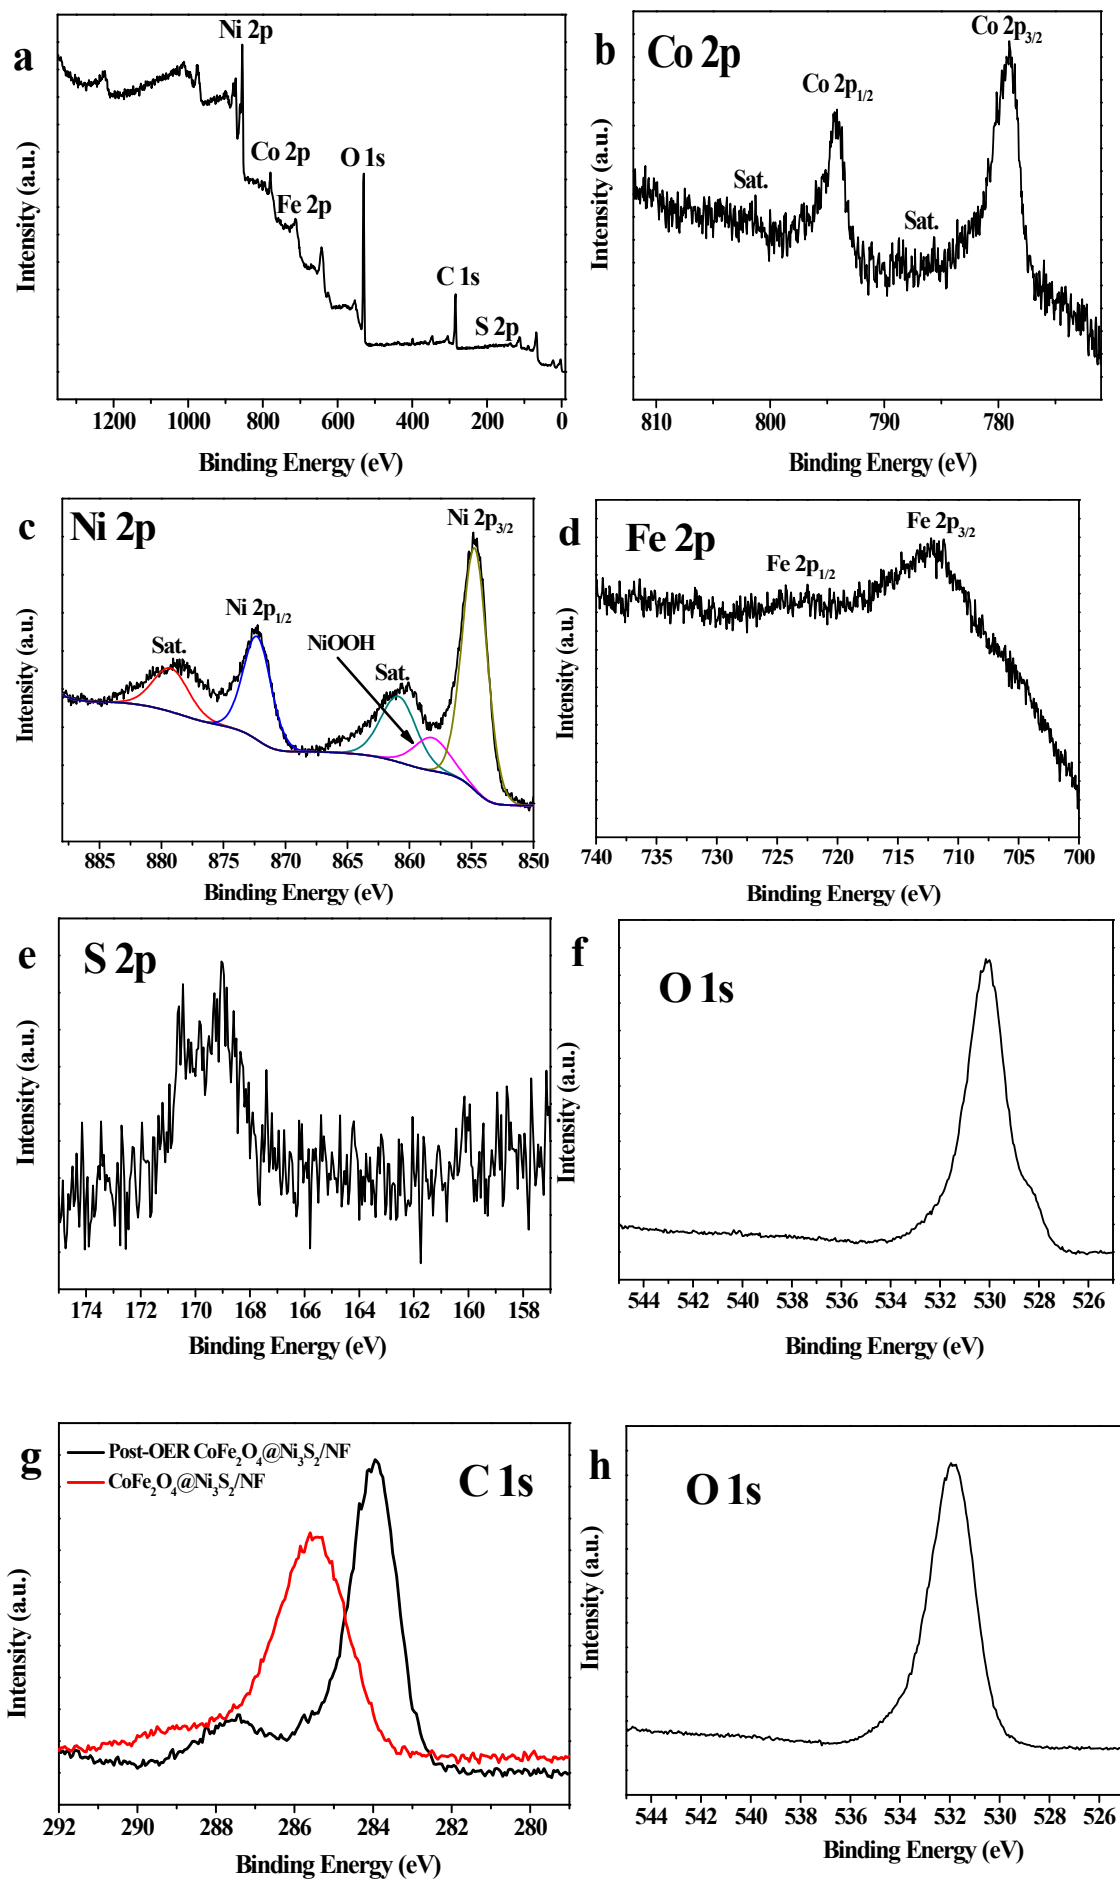

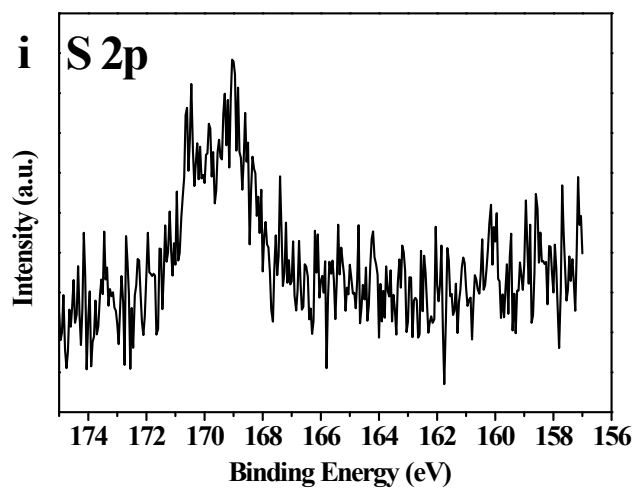

Figure S4 The XPS spectra of  $\text{CoFe}_2\text{O}_4@\text{Ni}_3\text{S}_2/\text{NF}$  after OER stability test: (a) survey, (b) Co 2p, (c) Ni 2p, (d) Fe 2p, (e) S 2p (f) O 1s and (g) C1s regions and the XPS spectra of  $\text{CoFe}_2\text{O}_4@\text{Ni}_3\text{S}_2/\text{NF}$  before OER stability test (h) O 1s and (h) S 2p.

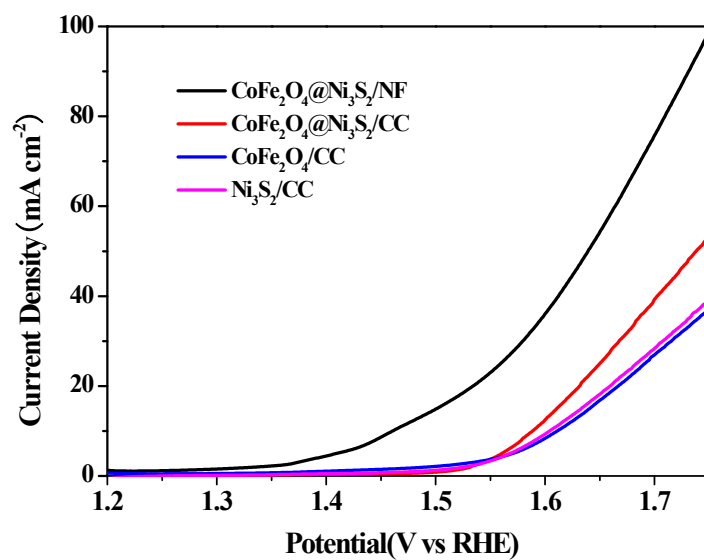

Figure S5. Polarization curves of as-prepared  $\text{CoFe}_2\text{O}_4@\text{Ni}_3\text{S}_2/\text{NF}$ ,  $\text{CoFe}_2\text{O}_4@\text{Ni}_3\text{S}_2/\text{CC}$ ,  $\text{CoFe}_2\text{O}_4/\text{CC}$  and  $\text{Ni}_3\text{S}_2/\text{CC}$ .

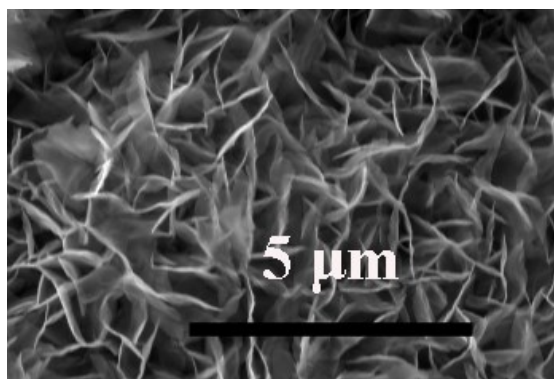

Figure S6 SEM image of  $\text{CoFe}_2\text{O}_4@\text{Ni}_3\text{S}_2/\text{NF}$  after OER stability test.

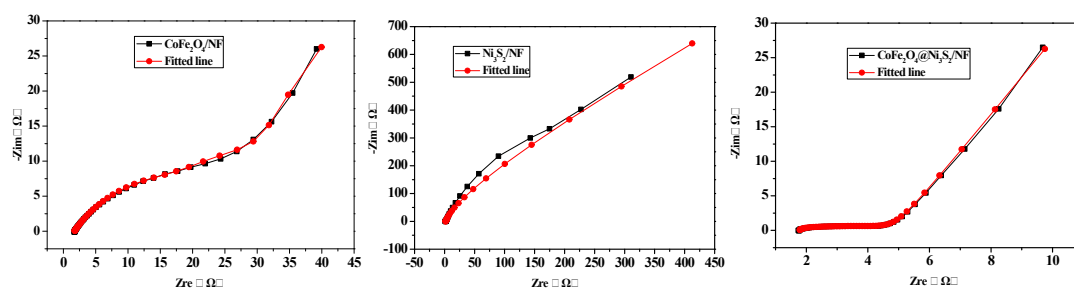

Figure S7. Fitted circuit pattern for EIS.

|          | $\text{CoFe}_2\text{O}_4@\text{Ni}_3\text{S}_2/\text{NF}$ | $\text{CoFe}_2\text{O}_4/\text{NF}$ | $\text{Ni}_3\text{S}_2/\text{NF}$ |
|----------|-----------------------------------------------------------|-------------------------------------|-----------------------------------|
| $R_{ct}$ | 15.01Ω                                                    | 137.1Ω                              | 506Ω                              |
